# Supplementary material for: Polarizing receptor activation dissociates fibroblast growth factor 2 mediated inhibition of myelination from its neuroprotective potential
Source: PubMed Central journal article supplement (PMC6923900; doi:10.1186/s40478-019-0864-6), 2019-12-19
Supplement: 40478_2019_864_MOESM1_ESM.pdf [file 40478_2019_864_MOESM1_ESM.pdf]

Online Resource 1: MS patient data and tissue used

| Patient | Tissue block | Age (yr) | Sex | Disease duration (yr) | pmd (hr) | Disease course | Cause of death                   | ISH | qIHC |    |        | IF |
|---------|--------------|----------|-----|-----------------------|----------|----------------|----------------------------------|-----|------|----|--------|----|
|         |              |          |     |                       |          |                |                                  |     | NAWM | RM | Lesion |    |
| MS12    | P3B2         | 56       | f   | 31                    | 8        | SP             | Breast carcinoma                 |     |      |    |        | X  |
| MS40    | A1D3         | 58       | f   | 21                    | 6        | PP             | Bronchopneumonia                 |     | 1    | 2  | 2      |    |
| MS46    | A5C4         | 40       | m   | 23                    | 18       | SP             | Multiple Sclerosis               |     |      |    |        | X  |
| MS54    | P4D3         | 69       | f   | 31                    | 11       | SP             | Acute pyelonephritis             |     |      |    |        | X  |
| MS71    | A2C4         | 78       | f   | 42                    | 5        | SP             | Metastatic carcinoma of bronchus |     |      |    |        | X  |
| MS79    | P4B3         | 49       | f   | 21                    | 7        | SP             | Bronchopneumonia                 |     | 1    | 2  | 2      | X  |
| MS106   | P5D6         | 39       | f   | 21                    | 18       | PP             | Bronchopneumonia                 |     | 1    | 2  | 3      | X  |
| MS122   | A2E7         | 44       | m   | Unknown               | 16       | SP             | Bronchopneumonia                 |     | 1    | 2  | 2      |    |
|         | X            |          |     |                       |          |                |                                  | 1   |      | 4  |        |    |
| MS136   | P5B2         | 40       | m   | 9                     | 10       | SP             | Respiratory failure              |     | 1    |    | 4      |    |
|         | X            |          |     |                       |          |                |                                  | 1   |      | 4  |        |    |
| MS154   | P5B7         | 34       | f   | Unknown               | 12       | SP             | Bronchopneumonia                 |     | 1    |    | 3      |    |
|         |              |          |     |                       |          |                |                                  | 1   | 3    | 6  |        |    |
| MS176   | P1A2         | 37       | m   | 27                    | 12       | PP             | Intestinal obstruction           |     | 1    |    | 5      |    |
| MS387   | A4B5         | 42       | f   | 11                    | 13       | SP             | Multiple Sclerosis               |     |      |    |        | X  |

f female; m male; PP primary progressive multiple sclerosis; SP secondary progressive multiple sclerosis
