# Supplementary material for: Polarizing receptor activation dissociates fibroblast growth factor 2 mediated inhibition of myelination from its neuroprotective potential
Source: PubMed Central journal article supplement (PMC6923900; doi:10.1186/s40478-019-0864-6), 2019-12-19
Supplement: 40478_2019_864_MOESM3_ESM.pdf [file 40478_2019_864_MOESM3_ESM.pdf]

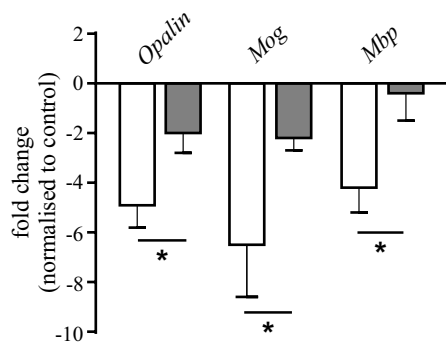

| gene          | Primer sequence                              |
|---------------|----------------------------------------------|
| <i>Opalin</i> | ACCTTCTTGAGCACCTCGTG<br>TGATCCAGCGAAGAAGAACC |
| <i>Mog</i>    | GCAGGTCTCTGTAGGCCTTG<br>GGCACTCTCAGGAAGTGAGG |
| <i>Mbp</i>    | TACCCTGGCTAAAGCAGAGCA<br>GGGAGCCGTAGTGGGTAGT |

**Online Resource 3. Differential regulation of myelin by FGF2 and F2V2.**

qPCR validation of some genes of interest from the microarray (paired t-test for fold changes FGF2 vs F2V2). Data are presented as means  $\pm$  SEM from at least 4 independent experiments; \* p<0.05; \*\* p<0.01
