# Supplementary material for: Polarizing receptor activation dissociates fibroblast growth factor 2 mediated inhibition of myelination from its neuroprotective potential
Source: PubMed Central journal article supplement (PMC6923900; doi:10.1186/s40478-019-0864-6), 2019-12-19
Supplement: 40478_2019_864_MOESM6_ESM.pdf [file 40478_2019_864_MOESM6_ESM.pdf]

Online Resource 6: qPCR validation for Wnt pathway genes

| gene         | qPCR validation<br>fold change (p-value FGF2 vs F2V2) |               | Microarray<br>fold change |      | primer sequence                               |
|--------------|-------------------------------------------------------|---------------|---------------------------|------|-----------------------------------------------|
|              | FGF2                                                  | F2V2          | FGF2                      | F2V2 |                                               |
| <i>Wnt2</i>  | 1.7±0.8                                               | 0.1±0.6 (*)   | 2.6                       | -1.4 | CATCTCAACAGAACCCCCTTT<br>CAGAATGCCCAAGACAGACA |
| <i>Wnt7b</i> | 2.4±0.4                                               | 0.7±0.5 (*)   | 3.3                       | 1.6  | ACAATGAGGCAGGCAGAAAG<br>AACTTGGGCAGGGTGGTC    |
| <i>Fos11</i> | 19.5±2.4                                              | 9.2±2.0 (***) | 18.2                      | 7.1  | GCTGCTAAGTGCAGAAACCG<br>TGCAGCTCTTCGATCTCACG  |
| <i>Smad3</i> | 2.9±0.3                                               | 2.1±0.3 (*)   | 2.6                       | 1.6  | CTTGGCTGCTGTTTCTGTTG<br>CACTTTTGTCCCTCTGGAA   |

Shown are mean +/- SEM of 7 independent experiments; p-values for fold changes of FGF2 vs F2V2 (paired t-test)
