# Supplementary material for: Polarizing receptor activation dissociates fibroblast growth factor 2 mediated inhibition of myelination from its neuroprotective potential
Source: Springer Nature journal article supplement (doi:10.1186/s40478-019-0864-6), 2019-12-01
Supplement: MOESM2 [file 25667046]

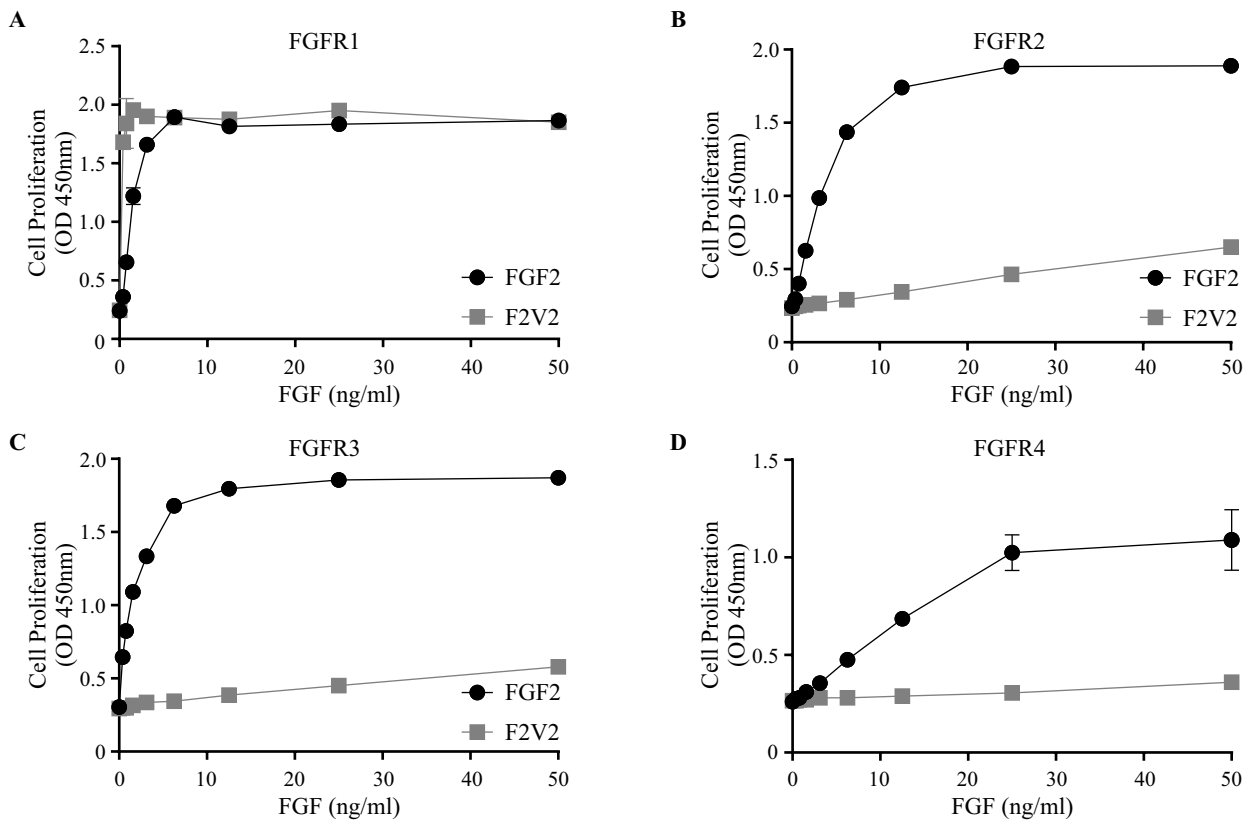

**Online Resource 2. N-terminal deletion of FGF2 results in selective activation of FGFR1.** Proliferation of FDCP-1 cells transfected with FGFR1 (A), FGFR2 (B), FGFR3 (C) or FGFR4 (D) following incubation with FGF2 or with a 26 amino acid N-terminal truncated variant of FGF2 (F2V2).
