# Supplementary material for: Polarizing receptor activation dissociates fibroblast growth factor 2 mediated inhibition of myelination from its neuroprotective potential
Source: Springer Nature journal article supplement (doi:10.1186/s40478-019-0864-6), 2019-12-01
Supplement: MOESM4 [file 25667046]

Online Resource 4: full list of enriched GO terms for genes more up-regulated by FGF2 (“S3” in Figure 3B)

| GO TERM                                                                                        | ENRICHMENT P-VALUE |
|------------------------------------------------------------------------------------------------|--------------------|
| SNRNA_METABOLIC_PROCESS                                                                        | 1.05E-07           |
| ANAPHASE_PROMOTING_COMPLEX_DEPENDENT_CATABOLIC_PROCESS                                         | 1.20E-06           |
| PROTEASOMAL_PROTEIN_CATABOLIC_PROCESS                                                          | 1.41E-06           |
| RIBOSOME_BIOGENESIS                                                                            | 2.42E-06           |
| TRANSCRIPTION_ELONGATION_FROM_RNA_POLYMERASE_II_PROMOTER                                       | 3.02E-06           |
| NCRNA_TRANSCRIPTION                                                                            | 3.10E-06           |
| DNA_TEMPLATED_TRANSCRIPTION_ELONGATION                                                         | 5.26E-06           |
| DNA_TEMPLATED_TRANSCRIPTION_INITIATION                                                         | 6.79E-06           |
| POSITIVE_REGULATION_OF_PROTEIN_MODIFICATION_BY_SMALL_PROTEIN_CONJUGATION_OR_REMOVAL            | 9.73E-06           |
| ANTIGEN_PROCESSING_AND_PRESENTATION_OF_EXOGENOUS_PEPTIDE_ANTIGEN_VIA_MHC_CLASS_I               | 1.05E-05           |
| REGULATION_OF_PROTEIN_UBIQUITINATION_INVOLVED_IN_UBIQUITIN_DEPENDENT_PROTEIN_CATABOLIC_PROCESS | 1.22E-05           |
| REGULATION_OF_LIGASE_ACTIVITY                                                                  | 1.31E-05           |
| NEGATIVE_REGULATION_OF_PROTEIN_MODIFICATION_BY_SMALL_PROTEIN_CONJUGATION_OR_REMOVAL            | 1.72E-05           |
| POSITIVE_REGULATION_OF_LIGASE_ACTIVITY                                                         | 1.87E-05           |
| PROTEIN_FOLDING                                                                                | 2.27E-05           |
| TRANSCRIPTION_INITIATION_FROM_RNA_POLYMERASE_II_PROMOTER                                       | 2.71E-05           |
| TRANSLATIONAL_ELONGATION                                                                       | 2.80E-05           |
| REGULATION_OF_ESTABLISHMENT_OF_PLANAR_POLARITY                                                 | 3.19E-05           |
| <b>NON_CANONICAL_WNT_SIGNALING_PATHWAY</b>                                                     | <b>3.83E-05</b>    |
| REGULATION_OF_CELLULAR_AMINO_ACID_METABOLIC_PROCESS                                            | 3.96E-05           |
| RNA_SPLICING_VIA_TRANSESTERIFICATION_REACTIONS                                                 | 4.73E-05           |
| REGULATION_OF_CELLULAR_PROTEIN_CATABOLIC_PROCESS                                               | 6.42E-05           |
| MITOCHONDRIAL_TRANSLATION                                                                      | 7.33E-05           |
| NIK_NF_KAPPAB_SIGNALING                                                                        | 7.95E-05           |
| TRANSLATIONAL_TERMINATION                                                                      | 8.88E-05           |
| ANTIGEN_PROCESSING_AND_PRESENTATION_OF_PEPTIDE_ANTIGEN_VIA_MHC_CLASS_I                         | 1.06E-04           |
| <b>POSITIVE_REGULATION_OF_CANONICAL_WNT_SIGNALING_PATHWAY</b>                                  | <b>1.07E-04</b>    |
| <b>NEGATIVE_REGULATION_OF_CANONICAL_WNT_SIGNALING_PATHWAY</b>                                  | <b>1.50E-04</b>    |
| POSITIVE_REGULATION_OF_VIRAL_TRANSCRIPTION                                                     | 1.50E-04           |
| CELLULAR_PROTEIN_COMPLEX_DISASSEMBLY                                                           | 1.65E-04           |
| GENE_SILENCING                                                                                 | 1.80E-04           |
| RRNA_METABOLIC_PROCESS                                                                         | 1.94E-04           |
| PROTEASOME_ASSEMBLY                                                                            | 1.95E-04           |
| TRNA_PROCESSING                                                                                | 2.12E-04           |
| MACROMOLECULAR_COMPLEX_DISASSEMBLY                                                             | 2.28E-04           |
| REGULATION_OF_GENE_EXPRESSION_EPIGENETIC                                                       | 3.28E-04           |

Online Resource 4: full list of enriched GO terms for genes more up-regulated by FGF2 (“S3” in Figure 3B)

|                             |          |
|-----------------------------|----------|
| REGULATION_OF_RNA_STABILITY | 3.69E-04 |
| PROTEIN_POLYUBIQUITINATION  | 3.78E-04 |

pathways potentially contributing to the inhibition of myelination (**bold**)
