# Supplementary material for: Polarizing receptor activation dissociates fibroblast growth factor 2 mediated inhibition of myelination from its neuroprotective potential
Source: Springer Nature journal article supplement (doi:10.1186/s40478-019-0864-6), 2019-12-01
Supplement: MOESM5 [file 25667046]

Online Resource 5: pathways of genes differentially regulated in FGF2 vs F2V2

| rank | pathway name                                           | p-value  | name of genes enriched                                                                                                                                                                                                                                                     |
|------|--------------------------------------------------------|----------|----------------------------------------------------------------------------------------------------------------------------------------------------------------------------------------------------------------------------------------------------------------------------|
| 1    | Rheumatoid arthritis                                   | 3.04e-06 | Atp6v0d2+, Ccl5-, Ccl12+, Ccl20+, Csf1-, Cxcl12-, Flt1+, Il1a+, Il1b+, Il11+, Jun+, Mmp3+, Tcigr1-, Tgfb1+, Tgfb3+, Tnfrsf11a-, Tnfrsf11+, Vegfa+                                                                                                                          |
| 2    | Cytokine-cytokine receptor interaction                 | 4.61e-06 | Bmp7+, Ccl5-, Ccl11-, Ccl12+, Ccl20+, Cclf1+, Csf1-, Cxcl11+, Cxcl12-, Cxcl13+, Cxcl16+, Cxcr4-, Egfr-, Figf+, Flt1+, Hgf-, Il1a+, Il1b+, Il1r1+, Il5+, Il11+, Lif+, Lifr-, Relt+, Tgfb1+, Tgfb3+, Tnfrsf9+, Tnfrsf11a-, Tnfrsf12a+, Tnfrsf11+, Tslp+                      |
| 3    | Bile secretion                                         | 2.62e-05 | Abcb1b+, Abcb4-, Abcc4-, Abcg2+, Adcy7+, Aqp4-, Aqp9-, Atp1a2-, Ca2+, Ephx1-, Kcnn2-, Ldlr+, Sctr+, Slc4a4-, Slc22a8-                                                                                                                                                      |
| 4    | Pathways in cancer                                     | 5.63e-04 | Birc3+, Bmp2+, Ccne1+, Ccne2+, Cebpa+, Egfr-, Epas1-, Fgf9+, Fgf10-, Fgfr3-, Figf+, Fzd1-, Fzd10-ps1-, Hgf-, Hhip-, Itga2+, Jun+, Lef1+, Mmp2-, Mmp9+, Myc+, Nfkbia+, Prkcg-, Ptgs2+, Rad51+, Rara+, Smad3+, Tgfb1+, Tgfb3+, Vegfa+, Wnt2+, Wnt4-, Wnt7a-, Wnt7b+, Zbtb16- |
| 5    | Neuroactive ligand-receptor interaction                | 5.64e-04 | Adra1d+, Agr1a+, Agr2-, Bdkrb2+, Cckbr+, Chrna3-, Crhr1+, Drd5+, F2rl1+, F2rl2+, Gabra4-, Galr1+, Gpr+, Gpr50+, Gpr83+, Grin3a-, Grm5-, Grpr+, Hcrtr1+, Hrh1+, Htr2a+, Lpar4-, Mchr1+, Nmur2-, P2rx6-, Prlhr-, S1pr1-, S1pr5-, Sctr+, Sstr4+, Tacr3+, Tshr-                |
| 6    | Hepatitis C                                            | 1.18e-03 | Cldn9-, Cldn11-, Cldn15+, Cldn23+, Ddx58-, Egfr-, Ifit1-, Irf1-, Irf7-, Irf9-, Ldlr+, Nfkbia+, Oas1b-, Oas2-, Ocln-, Pdk1+, Stat2-                                                                                                                                         |
| 7    | Complement and coagulation cascades                    | 1.43e-03 | Bdkrb2+, C1r-, C1s-, C3-, C7-, Cd55+, F3+, Plau+, Plaur+, Pros1-, Serping1-, Thbd+                                                                                                                                                                                         |
| 8    | Malaria                                                | 1.93e-03 | Ccl12+, Hgf-, Il1b+, Sdc1+, Sele+, Tgfb1+, Tgfb3+, Thbs4+, Vcam1-                                                                                                                                                                                                          |
| 9    | Leukocyte transendothelial migration                   | 1.94e-03 | Cldn9-, Cldn11-, Cldn15+, Cldn23+, Cxcl12-, Cxcr4-, Ezr+, Mmp2-, Mmp9+, Myl9-, Ncf1-, Ocln-, Prkcg-, Sipal1+, Vasp+, Vcam1-                                                                                                                                                |
| 10   | Glycine, serine and threonine metabolism               | 2.78e-03 | Cbs-, Chdh-, Cth+, Gamt-, Pipox-, Sardh+, Shmt1+                                                                                                                                                                                                                           |
| 11   | One carbon pool by folate                              | 2.89e-03 | Dhfr+, Mthfd11+, Mthfd2+, Mthfd21+, Shmt1+                                                                                                                                                                                                                                 |
| 12   | Influenza A                                            | 3.72e-03 | Ccl5-, Ccl12+, Ddx58-, Hspa2-, Il1a+, Il1b+, Irf7-, Irf9-, Jun+, Map2k3+, Mx2-, Nfkbia+, Nxt1+, Oas1b-, Oas2-, Rsad2-, Stat2-, Tlr7-, Tnfrsf10b+                                                                                                                           |
| 13   | Hepatitis B                                            | 4.52e-03 | Casp12-, Ccne1+, Ccne2+, Creb311+, Ddx58-, Egr2+, Egr3+, Irf7-, Jun+, Mmp9+, Myc+, Nfkbia+, Prkcg-, Stat2-, Stat4-, Tgfb1+, Tgfb3+                                                                                                                                         |
| 14   | Nicotinate and nicotinamide metabolism                 | 4.78e-03 | Aox1-, Aox3-, Enpp1+, Nampt+, Naprt1-, Nt5c1a-                                                                                                                                                                                                                             |
| 15   | NF-kappa B signaling pathway                           | 5.76e-03 | Birc3+, Cxcl12-, Ddx58-, Il1b+, Il1r1+, Lyn-, Nfkbia+, Plau+, Ptgs2+, Tnfrsf11a-, Tnfrsf11+, Vcam1-                                                                                                                                                                        |
| 16   | Prion diseases                                         | 5.84e-03 | C7-, Casp12-, Ccl5-, Egr1+, Il1a+, Il1b+, Notch1-                                                                                                                                                                                                                          |
| 17   | Basal cell carcinoma                                   | 6.27e-03 | Bmp2+, Fzd1-, Fzd10-ps1-, Hhip-, Lef1+, Wnt2+, Wnt4-, Wnt7a-, Wnt7b+                                                                                                                                                                                                       |
| 18   | Cytosolic DNA-sensing pathway                          | 8.30e-03 | Ccl5-, Ddx58-, Il1b+, Irf7-, Nfkbia+, Polr3g+, Ripk3+, Zbp1-                                                                                                                                                                                                               |
| 19   | Focal adhesion                                         | 8.73e-03 | Birc3+, Cav2-, Egfr-, Figf+, Flt1+, Hgf-, Itga2+, Itga5+, Itga7+, Itga9-, Itgb4-, Itgb5-, Jun+, Myl9-, Pdgd-, Prkcg-, Shc4+, Thbs4+, Vasp+, Vegfa+, Zyx+                                                                                                                   |
| 20   | Bladder cancer                                         | 9.43e-03 | Egfr-, Fgfr3-, Figf+, Mmp2-, Mmp9+, Myc+, Vegfa+                                                                                                                                                                                                                           |
| 21   | Measles                                                | 9.54e-03 | Ccne1+, Ccne2+, Ddx58-, Hspa2-, Il1a+, Il1b+, Irf7-, Irf9-, Mx2-, Nfkbia+, Oas1b-, Oas2-, Stat2-, Tlr7-, Tnfrsf10b+                                                                                                                                                        |
| 22   | MAPK signaling pathway                                 | 1.08e-02 | Bdnf+, Dusp1+, Dusp2+, Dusp4+, Dusp5+, Dusp6+, Dusp14+, Egfr-, Fgf9+, Fgf10-, Fgfr3-, Gadd45g+, Hspa2-, Hspb1-, Il1a+, Il1b+, Il1r1+, Jun+, Map2k3+, Map3k6+, Myc+, Ngf+, Prkcg-, Rasgrf2+, Tgfb1+, Tgfb3+                                                                 |
| 23   | TGF-beta signaling pathway                             | 1.15e-02 | Bmp2+, Bmp6-, Bmp7+, Fst+, Inhba+, Myc+, Smad3+, Smad9-, Tgfb1+, Tgfb3+, Thbs4+                                                                                                                                                                                            |
| 24   | Arachidonic acid metabolism                            | 1.27e-02 | Cbr1+, Cbr3+, Cyp4f1-, Cyp4f4-, Cyp4f17-, Gpx2+, Pla2g5-, Ptges+, Ptgs1+, Ptgs2+, Tbxas1+                                                                                                                                                                                  |
| 25   | Arrhythmogenic right ventricular cardiomyopathy (ARVC) | 1.29e-02 | Dsc2+, Gja1-, Itga2+, Itga5+, Itga7+, Itga9-, Itgb4-, Itgb5-, Lef1+, Sgcg-                                                                                                                                                                                                 |
| 26   | Glycerolipid metabolism                                | 1.55e-02 | Agpat2+, Akr1b8+, Akr1b10-, Gpam-, Lipg+, Mboat1+, Mgl1-, Pnlip-                                                                                                                                                                                                           |
| 27   | ErbB signaling pathway                                 | 1.96e-02 | Areg+, Egfr-, Eif4ebp1+, Ereg+, Hbegf+, Jun+, Myc+, Nck2+, Nrg1+, Prkcg-, Shc4+                                                                                                                                                                                            |
| 28   | GnRH signaling pathway                                 | 1.96e-02 | Adcy7+, Egfr-, Hbegf+, Iptr3+, Jun+, Map2k3+, Mmp2-, Mmp14+, Pld1-, Pld2-, Prkcd+                                                                                                                                                                                          |
| 29   | Dilated cardiomyopathy                                 | 1.96e-02 | Adcy7+, Itga2+, Itga5+, Itga7+, Itga9-, Itgb4-, Itgb5-, Sgcg-, Tgfb1+, Tgfb3+, Tpm2+                                                                                                                                                                                       |
| 30   | Gap junction                                           | 2.13e-02 | Adcy7+, Egfr-, Gja1-, Grm5-, Htr2a+, Iptr3+, Pdgd-, Prkcg-, Tuba1c+, Tuba8+, Tubb6+                                                                                                                                                                                        |
| 31   | Leishmaniasis                                          | 2.34e-02 | C3-, Il1a+, Il1b+, Jun+, Ncf1-, Nfkbia+, Ptgs2+, Tgfb1+, Tgfb3+                                                                                                                                                                                                            |

Online Resource 5: pathways of genes differentially regulated in FGF2 vs F2V2

|    |                                              |                 |                                                                                                                                              |
|----|----------------------------------------------|-----------------|----------------------------------------------------------------------------------------------------------------------------------------------|
| 32 | Osteoclast differentiation                   | 2.63e-02        | Csf1-, Fosl1+, Il1a+, Il1b+, Il1r1+, Irf9-, Jun+, Ncf1-, Nfkbia+, Stat2-, Tgfb1+, Tnfrsf11a-, Tnfsf11+                                       |
| 33 | Hematopoietic cell lineage                   | 2.66e-02        | Cd55+, Csf1-, Il1a+, Il1b+, Il1r1+, Il5+, Il11+, Itga2+, Itga5+, Mme-                                                                        |
| 34 | Chemokine signaling pathway                  | 2.74e-02        | Adcy7+, Ccl5-, Ccl11-, Ccl12+, Ccl20+, Cxc111+, Cxc112-, Cxc113+, Cxc116+, Cxcr4-, Fgr+, Gng11+, Lyn-, Ncf1-, Nfkbia+, Prked+, Shc4+, Stat2- |
| 35 | Hypertrophic cardiomyopathy (HCM)            | 3.12e-02        | Itga2+, Itga5+, Itga7+, Itga9-, Itgb4-, Itgb5-, Sgcg-, Tgfb1+, Tgfb3+, Tpm2+                                                                 |
| 36 | Notch signaling pathway                      | 3.28e-02        | Dll1-, Dtx31-, Dtx4-, Hes5-, Jag1+, Notch1-, Notch4+                                                                                         |
| 37 | Melanogenesis                                | 3.60e-02        | Adcy7+, Creb311+, Edn1-, Fzd1-, Fzd10-ps1-, Lef1+, Prkcg-, Wnt2+, Wnt4-, Wnt7a-, Wnt7b+                                                      |
| 38 | Pertussis                                    | 3.62e-02        | C1r-, C1s-, C3-, Il1a+, Il1b+, Irf1-, Itga5+, Jun+, Serping1-                                                                                |
| 39 | Chemical carcinogenesis                      | 3.92e-02        | Adh1-, Aldh1a3+, Cbr1+, Cyp3a9+, Ephx1-, Gsta3-, Hsd11b1+, Mgst1-, Ptgs2+, Sult1a1-                                                          |
| 40 | Transcriptional misregulation in cancer      | 3.96e-02        | Birc3+, Cebpa+, Dusp6+, Erg+, Eya1-, Flt1+, Hmga2+, Hoxb9+, Igfbp3+, Mmp3+, Mmp9+, Myc+, Plau+, Rara+, Runx2+, Zbtb16-                       |
| 41 | Cell cycle                                   | 4.35e-02        | Ccne1+, Ccne2+, Cdc6+, Gadd45g+, Mcm3+, Mcm5+, Mcm6+, Myc+, Orc1+, Smad3+, Tgfb1+, Tgfb3+, Wee1+                                             |
| 42 | African trypanosomiasis                      | 4.42e-02        | F2r11+, Il1b+, Prkcg-, Sele+, Vcam1-                                                                                                         |
| 43 | Metabolism of xenobiotics by cytochrome P450 | 4.52e-02        | Adh1-, Aldh1a3+, Cbr1+, Cbr3+, Cyp2d4-, Cyp3a9+, Ephx1-, Gsta3-, Hsd11b1+, Mgst1-                                                            |
| 44 | <b>Wnt signaling pathway</b>                 | <b>4.88e-02</b> | <b>Fosl1+, Fzd1-, Fzd10-ps1-, Jun+, Lef1+, Lrp5+, Myc+, Peg12+, Prkcg-, Sfrp2-, Smad3+, Wnt2+, Wnt4-, Wnt7a-, Wnt7b+</b>                     |

+ up-regulated genes, - down-regulated genes
